# Supplementary material for: Aerosol-assisted synthesis of titania-based spherical and fibrous materials with a rational design of mesopores using PS-b-PEO
Source: Royal Society of Chemistry journal article supplement (doi:10.1039/d2dt03402f), 2022-12-03
Supplement: d2dt03402f1.pdf [file d2dt03402f1.pdf]

## Supporting Information

### Aerosol-assisted synthesis of titania-based spherical and fibrous materials with a rational design of mesopores using PS-*b*-PEO

Yuxiao Zhang, Ryutaro Wakabayashi and Tatsuo Kimura\*

*National Institute of Advanced Industrial Science and Technology (AIST),  
Sakurazaka, Moriyama-ku, Nagoya 463-8560, Japan.*

*E-mail: t-kimura@aist.go.jp*

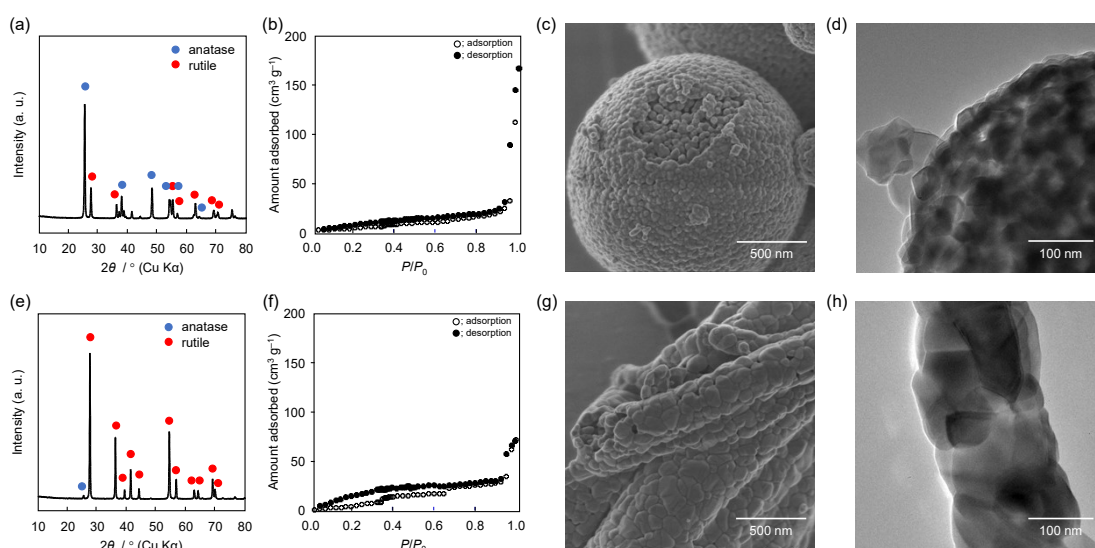

**Fig. S1** (a) XRD pattern, (b) N<sub>2</sub> adsorption-desorption isotherm, (c) SEM and (d) TEM images of a typical sample showing spherical morphology calcined at 700 °C and (e-h) those of that showing fibrous one.
